# Supplementary material for: Development of an integrated microfluidic solid-phase extraction and electrophoresis device
Source: Royal Society of Chemistry journal article supplement (doi:10.1039/c5an02352a), 2016-01-01
Supplement: c5an02352a1.pdf [file c5an02352a1.pdf]

## Electronic Supplementary Information for

### DEVELOPMENT OF AN INTEGRATED MICROFLUIDIC SOLID-PHASE EXTRACTION AND ELECTROPHORESIS DEVICE

Suresh Kumar, Vishal Sahore, Chad I. Rogers and Adam T. Woolley\*

Department of Chemistry and Biochemistry, Brigham Young University, UT 84602-5700, USA

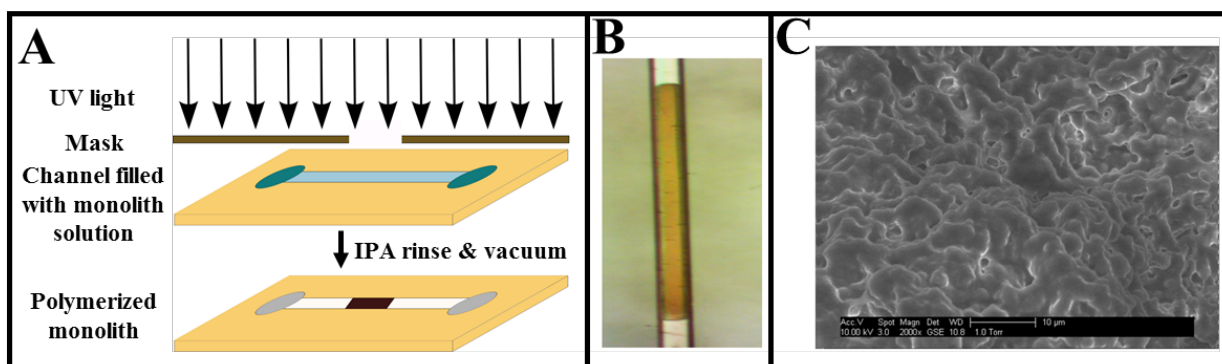

**Figure S1.** C8 monolith fabrication. (A) Schematic showing fabrication. (B) Photograph of a C8 monolith in a COC channel. (C) SEM image showing internal structure of a C8 monolith.
